# Supplementary material for: Talin-activated vinculin interacts with branched actin networks to initiate bundles
Source: eLife. 2020 Nov 13;9:e53990. doi: 10.7554/eLife.53990 (PMC7682986; doi:10.7554/eLife.53990)
Supplement: Figure 1—source data 1. [file elife-53990-fig1-data1.xlsx]

## Sheet:  data figure 1F
	lamellipodium-like network length, µm			Raw Intregated actin fluorescence density / network length				These values were plotted in Figure 1F
	with VBS1-activated vinculin at :				with VBS1-activated vinculin at :
actin alone	250 nM	500 nM		actin alone	250 nM	500 nM
141.578	32.616	27.935		8681.79	34380.7	31467.9
138.214	42.122	38.466		8611.36	21879.3	27246.2
124.905	26.034	32.908		9280.83	18525.6	31329.2
126.075	34.517	7.02		9981.73	20521.1	22591.5
121.98	49.143	28.228		11359.2	20078.9	25667.2
104.867	43.731	36.711		11120.8	22239.7	34860.9
103.844	44.316	57.187		12281.1	23369.4	26437.1
106.184	44.17	25.888		10147.9	26167.3	25204.8
105.745	43.585	37.003		11714.1	27608	28874.1
101.942	47.095	44.755		11619.9	27719	37397.7
107.061	39.929	29.544		12364.5	29657.7	37580.8
110.864	38.905	12.286		10315.1	29156.8	29468.9
126.952	39.636	42.269		11026.1	26123.4	43331.9
132.218	45.633	15.796		10805.6	26785.4	35510.4
128.854	42.269	37.296		10412	21838.2	39342.3
127.099	50.167	25.156		9119.94	22398.8	30703.1
143.187	49.435	45.925		8678.11	23311.3	29828
161.177	54.554	44.755		9564.59	21396.2	27193
138.214	52.068	10.092		9056.92	22851.6	21191.4
130.609	23.694	20.33		11171.5	21500.2	24402.5
122.126	33.347	41.537		10819.1	34130.9	30052.8
111.888	31.592	45.633		10784.3	30995.7	29788.4
109.694	36.418	26.765		11115.6	31469	30544.4
99.748	26.034	52.946		11723.2	31943.7	29609.2
89.364	42.269	10.823		11305.6	25042.4	24917.3
92.728	40.952	23.986		13350.7	24754.1	24423.2
88.34	45.194	59.673		12093	24338.3	29364.1
88.34	35.248	14.333		10840.4	21140.9	18765.5
87.463	39.197	32.031		11930.6	22333.2	25721.3
101.65	47.388	23.548		10071.9	26038.1	30914.1
104.282	29.69	39.197		8696.83	23289.7	34411.1
109.401	36.272	19.599		7742.49	26401.1	34707.3
106.476	37.735	40.221		9409.64	28901.5	41692.1
122.272	42.269	22.816		8175.36	29664.6	42450.1
90.242	41.976	35.248		9583.59	20642.7	31117.1
101.503	45.048	39.929		11146.3	21278.4	32677.6
101.211	36.272	31.299		8600.91	19088.7	27017.6
100.187	35.541	35.395		9802.9	22769.1	29981.2
93.167	36.711	33.786		10101.5	20676.5	21253.5
	30.422	32.908			20278.1	23336.6
	39.197	31.153			19359.7	26616.8
	38.612	37.588			20362.4	27917.4
	38.612	15.503			21082.5	26037
	27.935	32.616			20235.2	25757.6
	35.541	35.687			18001	27068.5
	33.786	27.058			19787.9	22473.9
	38.32	19.745			18179.9	22090.4
	31.299	23.401			18876	28434.5
	33.347	29.983			19755.7	31077.9
	23.255	22.67			19559.3	28788.1
	32.323	15.357			21500.1	27313.4
	30.714	22.816			21742.8	25751.5
	24.864	29.837			21510.3	28029.6
	20.184	38.759			17629	29663.9
	39.636	34.663			24691.5	31980.6
	33.639	45.779			25778.3	23712.6
	34.224	34.81			21812.8	27490.7
	34.81	37.881			23079.7	27934.2
	32.908	30.568			22674.1	28286
	31.592	26.18			22922.2	28148
	34.224	23.255			19079.4	28976.1
	35.102	27.643			21439.2	26035.1
	33.054	31.299			18674	28994.5
	36.272	36.078			19329.3	26041.1
	39.49	34.785			19555.2	27769
	25.449	36.461			17995.1	25298.8
	35.248	37.249			19043.7	29779.3
	37.735	14.821			20648.9	28327.3
	37.442	19.112			18565	32590.3
	34.371	35.388			20605.8	33258
	30.714	39.589			19857	30773.5
	35.687	21.191			19955.3	25748.7
	37.003	28.837			21800.7	28749.4
	40.221	39.003			23683	25417.3
	27.789	34.537			21045.2	26850.7
	38.612	34.446			21414.7	24226.1
	39.197	41.947			23221.2	25869.9
	42.269	37.484			20074.6	27084.6
	41.537	35.652			19705.7	28416
	40.806	21.988			20683.2	28438.9
	38.466	18.241			20746.9	27978
	30.568	17.773			24324	27343.4
	29.837	27.118			25298.9	29867.7
		12.088				27419.5

## Sheet: statistics  figure 1F
Number of families	1
Number of comparisons per family	3
Alpha	0.05
Holm-Sidak's multiple comparisons test	Mean Diff.	Significant?	Summary	Adjusted P Value	columns
Length_"actin" vs. Length_"250 nM vinc."	75.89	Yes	****	<0.0001	A-B
Length_"actin" vs. Length_"500nM vinc."	82.16	Yes	****	<0.0001	A-C
Length_"250 nM vinc." vs. Length_"500nM vinc."	6.271	Yes	****	<0.0001	B-C
Test details	Mean 1	Mean 2	Mean Diff.	SE of diff.	n1	n2	t	DF
Length_"actin" vs. Length_"250 nM vinc."	112.9	36.98	75.89	2.505	39	83	30.3	38
Length_"actin" vs. Length_"500nM vinc."	112.9	30.71	82.16	3.128	39	84	26.27	38
Length_"250 nM vinc." vs. Length_"500nM vinc."	36.98	30.71	6.271	1.335	83	84	4.697	82
Number of families	1		RID:L is "raw integrated density / network length"
Number of comparisons per family	3
Alpha	0.05
Holm-Sidak's multiple comparisons test	Mean Diff.	Significant?	Summary	Adjusted P Value	columns
RID:L_"actin" vs. RID:L_"250 nM vinc."	-12372	Yes	****	<0.0001	E-F
RID:L_"actin" vs. RID:L_"500 nM vinc."	-18414	Yes	****	<0.0001	E-G
RID:L_"250 nM vinc." vs. RID:L_"500 nM vinc."	-6041	Yes	****	<0.0001	F-G
Test details	Mean 1	Mean 2	Mean Diff.	SE of diff.	n1	n2	t	DF
RID:L_"actin" vs. RID:L_"250 nM vinc."	10375	22747	-12372	656.8	39	83	18.84	38
RID:L_"actin" vs. RID:L_"500 nM vinc."	10375	28788	-18414	870.7	39	84	21.15	38
RID:L_"250 nM vinc." vs. RID:L_"500 nM vinc."	22747	28788	-6041	506.1	83	84	11.94	82

## Sheet: Gaussian-fit-length
		lamellipodium-like network length, counts						lamellipodium-like network length, counts
		with VBS1-activated vinculin at :			Frequency distribution			with VBS1-activated vinculin at :
	actin alone	250 nM	500 nM			Bin Center	actin alone	250 nM	500 nM
Gaussian						5	0	0	1
Best-fit values						10	0	0	4
Amplitude	4.502	26.72	16.77			15	0	0	5
Mean	107.4	37.04	31.8			20	0	1	8
SD	16.96	5.976	9.693			25	0	6	13
						30	0	12	12
95% CI (profile likelihood)						35	0	25	21
Amplitude	3.246 to 6.133	25.36 to 28.10	14.67 to 18.97			40	0	25	12
Mean	101.5 to 114.3	36.70 to 37.38	30.31 to 33.21			45	0	9	5
SD	9.761 to 24.49	5.605 to 6.370	8.263 to 11.35			50	0	4	0
						55	0	1	2
Goodness of Fit						60	0	0	1
Degrees of Freedom	29	29	29			65	0	0	0
R squared	0.6219	0.9872	0.9163			70	0	0	0
Sum of Squares	45.18	16.86	68.11			75	0	0	0
Sy.x	1.248	0.7624	1.532			80	0	0	0
						85	1	0	0
Constraints						90	4	0	0
SD	SD > 0	SD > 0	SD > 0			95	2	0	0
						100	6	0	0
Number of points						105	7	0	0
# of X values	32	32	32			110	4	0	0
# Y values analyzed	32	32	32			115	0	0	0
						120	3	0	0
						125	4	0	0
						130	3	0	0
						135	0	0	0
						140	3	0	0
						145	1	0	0
						150	0	0	0
						155	0	0	0
						160	1	0	0

## Sheet: Gaussian-fit-RIDoverL
		Raw Intregated actin fluorescence density / network length, counts						Raw Intregated actin fluorescence density / network length, counts
		with VBS1-activated vinculin at :			Frequency distribution			with VBS1-activated vinculin at :
	actin alone	250 nM	500 nM			Bin Center	actin alone	250 nM	500 nM
Gaussian						8000	7	0	0
Best-fit values						10000	17	0	0
Amplitude	18.58	24.57	22.19			12000	14	0	0
Mean	10543	21197	27976			14000	1	0	0
SD	1737	2331	2607			16000	0	0	0
						18000	0	8	1
95% CI (profile likelihood)						20000	0	24	0
Amplitude	17.52 to 19.65	20.50 to 28.93	19.08 to 25.55			22000	0	22	5
Mean	10423 to 10661	20761 to 21689	27577 to 28379			24000	0	10	6
SD	1627 to 1856	1862 to 2924	2134 to 3164			26000	0	8	15
						28000	0	3	25
Goodness of Fit						30000	0	4	14
Degrees of Freedom	16	16	16			32000	0	2	7
R squared	0.9907	0.9224	0.9426			34000	0	2	4
Sum of Squares	4.218	74.35	46.61			36000	0	0	1
Sy.x	0.5134	2.156	1.707			38000	0	0	2
						40000	0	0	1
Constraints						42000	0	0	2
SD	SD > 0	SD > 0	SD > 0			44000	0	0	1
Number of points
# of X values	19	19	19
# Y values analyzed	19	19	19
